# Supplementary material for: Cryo-EM structure of coronavirus-HKU1 haemagglutinin esterase reveals architectural changes arising from prolonged circulation in humans
Source: Springer Nature journal article supplement (doi:10.1038/s41467-020-18440-6), 2020-09-16
Supplement: 41467_2020_18440_MOESM3_ESM.pdf [file 41467_2020_18440_MOESM3_ESM.pdf]

## **Description of Additional Supplementary Files**

File Name: Supplementary Data 1

Description: Overview of HKU1-HE glycoproteomics data. Full lists of identified site-specific glycoforms and their semiquantitative analysis are provided per protease dataset.

File Name: Supplementary Data 2

Description: HKU1 and BCoV HE sequences used for sequence conservation analysis.
